# Supplementary material for: Mutations in the bacterial cell division protein FtsZ highlight the role of GTP binding and longitudinal subunit interactions in assembly and function
Source: PubMed Central journal article supplement (PMC4603965; doi:10.1186/s12866-015-0544-z), 2015-10-13
Supplement: 12866_2015_544_MOESM1_ESM.pdf [file 12866_2015_544_MOESM1_ESM.pdf]

**Additional File 2:** *zapA* overexpression does not restore colony formation to *ftsZ84* cells under nonpermissive conditions

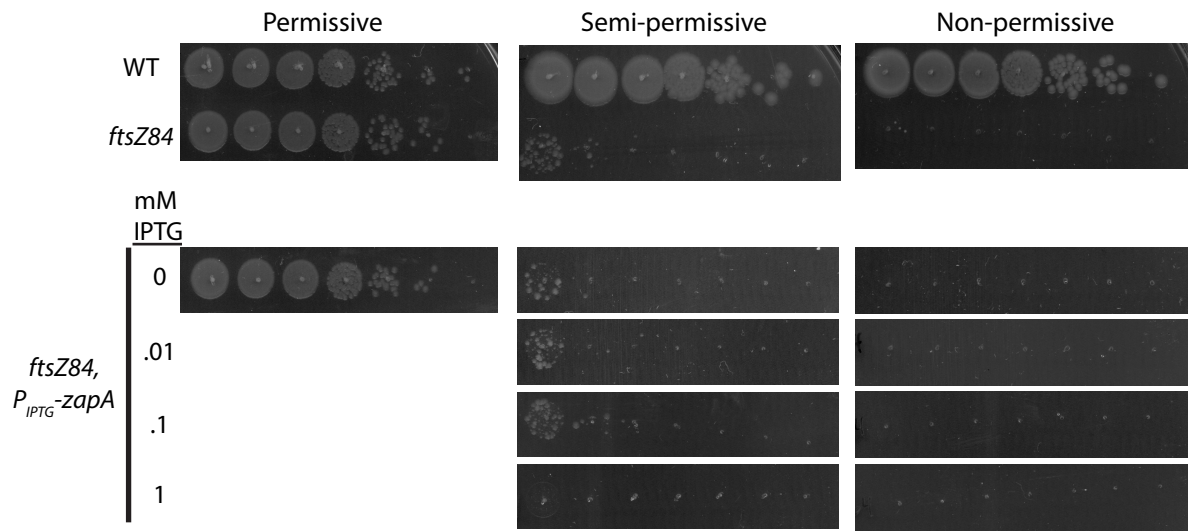

Cells were grown to an OD<sub>600</sub> of 0.2 in permissive conditions without inducer (LB-1%NaCl, 30°C). Cells were serially diluted 10-fold and 10 μl of each dilution were plated onto permissive (LB-1% NaCl, 30°C), semi-permissive (LB-no salt, 37°C), or nonpermissive (LB-no salt, 42°C) conditions with varying concentrations of IPTG.
